# Supplementary material for: MiR-92a modulates proliferation, apoptosis, migration, and invasion of osteosarcoma cell lines by targeting Dickkopf-related protein 3
Source: Oxford University Press journal article supplement (doi:10.1042/bsr20190410), 2019-03-29
Supplement: bsr-2019-0410_supp.pdf [file bsr-2019-0410_supp.pdf]

**Figure S1.** The comparison of two siRNAs for DKK3 (siDKK3-1, siDKK3-2) was detected by qRT-PCR. The efficiency of siDKK3-1 is better than siDKK3-2.

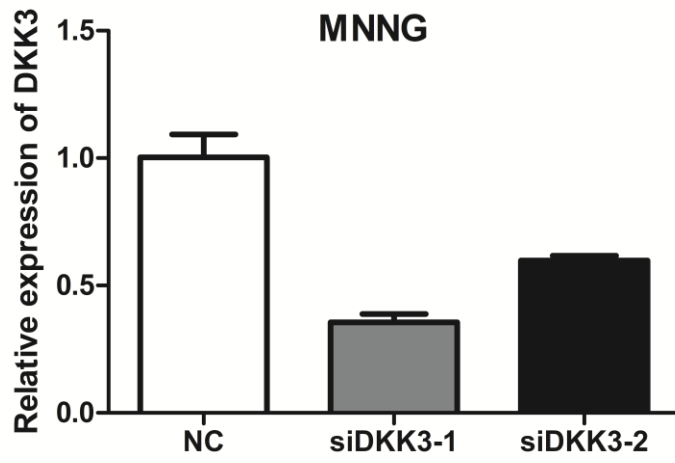

**Table S1.** 53 coincident targets obtained by overlapping three predicted lists.

| <b>53 overlapping targets</b> |          |          |        |         |         |          |         |
|-------------------------------|----------|----------|--------|---------|---------|----------|---------|
| CD69                          | DCAF6    | HIPK3    | BTG2   | PPCS    | ERGIC2  | ANP32E   | DUSP10  |
| DKK3                          | ADRB1    | DUSP5    | RSBN1  | RNF141  | PLEKHA1 | MIA3     | CPEB3   |
| MCOLN2                        | LMBR1L   | AIDA     | PIK3R3 | ITGA5   | CDKN1C  | FAR1     | OTUD3   |
| BSDC1                         | ZDHHC5   | RGL1     | ZFC3H1 | SESN3   | PTEN    | KLF6     | LMO2    |
| DENND4B                       | FNBP4    | ARHGAP29 | TWF1   | PIK3AP1 | GRAMD1B | FMN2     | UBASH3B |
| KIF5B                         | SLC25A16 | HIPK1    | QSER1  | SLC38A2 | ATP2B4  | FAM160B1 | S1PR1   |
| LUZP1                         | MAPK8    | ANK3     | CCSER2 | PGAM1   |         |          |         |
